# Automatically Generated Algorithms for the Vertex Coloring Problem

Carlos Contreras Bolton<sup>1</sup>, Gustavo Gatica<sup>2</sup>, Víctor Parada<sup>1\*</sup>

<sup>1</sup> Departamento de Ingeniería Informática, Universidad de Santiago de Chile, Santiago, Chile, <sup>2</sup> Escuela de Informática, Universidad Andrés Bello, Santiago, Chile

## Abstract

The vertex coloring problem is a classical problem in combinatorial optimization that consists of assigning a color to each vertex of a graph such that no adjacent vertices share the same color, minimizing the number of colors used. Despite the various practical applications that exist for this problem, its NP-hardness still represents a computational challenge. Some of the best computational results obtained for this problem are consequences of hybridizing the various known heuristics. Automatically revising the space constituted by combining these techniques to find the most adequate combination has received less attention. In this paper, we propose exploring the heuristics space for the vertex coloring problem using evolutionary algorithms. We automatically generate three new algorithms by combining elementary heuristics. To evaluate the new algorithms, a computational experiment was performed that allowed comparing them numerically with existing heuristics. The obtained algorithms present an average 29.97% relative error, while four other heuristics selected from the literature present a 59.73% error, considering 29 of the more difficult instances in the DIMACS benchmark.

**Citation:** Contreras Bolton C, Gatica G, Parada V (2013) Automatically Generated Algorithms for the Vertex Coloring Problem. PLoS ONE 8(3): e58551. doi:10.1371/journal.pone.0058551

**Editor:** Aaron Alain-Jon Golden, Albert Einstein College of Medicine, United States of America

**Received:** July 26, 2012; **Accepted:** February 6, 2013; **Published:** March 13, 2013

**Copyright:** © 2013 Contreras Bolton et al. This is an open-access article distributed under the terms of the Creative Commons Attribution License, which permits unrestricted use, distribution, and reproduction in any medium, provided the original author and source are credited.

**Funding:** Funding was provided by the Complex Engineering Systems Institute (ICM: P-05-004-F, CONICYT: FBO16) and DICYT-USACH. The funders had no role in study design, data collection and analysis, decision to publish, or preparation of the manuscript.

**Competing Interests:** The authors have declared that no competing interests exist.

\* E-mail: victor.parada@usach.cl

## Introduction

The vertex coloring problem (VCP) consists of identifying the lowest number of colors required to color a graph. Let  $G = (V, E)$  be an undirected graph, where  $V$  is a set of vertices and  $E$  is a set of edges. A function  $F: V \rightarrow \mathcal{N}$  is defined, where  $\mathcal{N}$  is a finite set of colors such that if  $u$  and  $v \in V$  and  $(u, v) \in E$ , then  $F(u) \neq F(v) \forall u, v$ . The objective is to find the chromatic number,  $\chi(G)$ , corresponding to the minimum number of colors needed to color  $G$  [1].

Because of its NP-hardness [2], the VCP has been treated using various methods: exact, constructive heuristics, and metaheuristics [3]. The exact methods consider different integer programming formulations. Its solution, however, does not completely consider the problem as certain instances belong to the known benchmarks that cannot be solved in reasonable times and their  $\chi(G)$  values remain unknown. To obtain results with low computational times, Méndez-Díaz and Zabala [4], [5] combine linear integer programming with instance preprocessing methods, while Malagutti et al. [6] combine branch-and-price with an algorithm that integrates tabu search, greedy, and evolutionary algorithm components and reports 33 optimum values, of which five were “open for several years”, leaving 28 problems with unknown  $\chi(G)$  among the 115 analyzed instances.

Constructive heuristic methods integrate elementary heuristic functions that color a graph step-by-step, considering decisions on the next vertex to color and color to use [7–9]. Because the heuristics can be easily implemented in polynomial time, they are also used as tools within other algorithms. Malagutti et al. [10] propose an evolutionary algorithm that combines tabu search, generating a set of initial solutions through the well-known greedy constructive heuristics SEQ [3], DSATUR [7] and Recursive

Largest First (RLF) [8]. The initial solutions are then improved by solving a set-covering problem. Although such hybridization obtains better solutions than other methods, several hours of computational time are required to achieve them.

Various metaheuristic approaches have resulted from heuristic combinations to solve the VCP. Combining evolutionary techniques with simulated annealing has allowed finding new chromatic numbers for various test instances [11], [12]. Another interesting combination of a genetic algorithm with the classical tabu search [13] provides a method with five different versions, obtaining optimum solutions for some hard instances of the DIMACS benchmark, with a computational time limit of 12 hours [14]. The existing VCP results indicate that an adequate method combination can solve some of the more difficult instances, but the combinations revised so far represent a small part of those that can possibly be revised.

The selection of an appropriate combination of heuristics to solve a problem, can be performed automatically. In fact, Minton [15] proposed an analytical learning system, which from a set of generic heuristics, produces specific heuristic combinations for the constraint-satisfaction problem. For the same problem, Epstein et al. [16] have proposed an adaptive engine that, from a set of elementary methods, produces a combination of heuristics that learn from their past decisions, as the search progresses. The engine is not only capable of finding novel heuristic for the problem, but also it rediscovers existing heuristics. Also, Nareyek [17] proposed a method that uses reinforcement learning to discover the best heuristic to be adopted at each stage of a search process. A particular case of the constraint satisfaction problem is the MAX-SAT, which is to determine a solution that satisfies a

maximum number of constraints, therefore, it can be seen as a typical combinatorial optimization problem. Bain et al. [18] proposed a novel way to solve the problem by means of genetic programming [19,20], i.e., evolving algorithms that are combinations of elementary heuristics already known for the problem. Also, Fukunaga [21,22] proposed a heuristic evaluation system for solving the satisfiability problem. The new heuristics produced are competitive with some of the existing ones, showing that for this problem, genetic programming can automatically produce new algorithms. In the field of combinatorial optimization, the hyper-heuristics [23] are a generalization of metaheuristics. Such techniques also can combine heuristics to solve difficult optimization problems. These have been tested with various problems such as timetabling [24] problem and strip packing problem [25].

In this paper, we suggest that a combination of heuristics for VCP can be performed using evolutionary computation, which allows new algorithms to be produced that use already existing techniques constructed from elementary heuristic components and control structures typical of any algorithm type, producing procedures that can compete with existing heuristics. The participation of the elementary heuristics and control structures are coded using binary strings that are subjected to selection, crossover and mutation operations at each stage [26,27]. Using some control parameters, we detected that the new algorithms have characteristics common to existing heuristics.

The automatic revision of heuristic combinations enables studying the potential algorithms that solve the VCP with low computational requirements and obtain high-quality solutions. The algorithms that can be generated would thus allow detecting heuristic combinations with good performance for given groups of VCP instances.

The following section of this paper describes the procedures involved in generating the new algorithms, while the third section presents and discusses the computational results of the generated algorithms. The last section presents the conclusions of the study.

### Procedure for Generating the Algorithms

This section presents the evolutionary process used to obtain algorithms for the VCP. The process follows similar steps to those used in genetic programming to represent a problem [19,20]. This means that it has to be defined the representation used, the data structures, the fitness function definition, the corresponding functions and terminals with elementary heuristics used to generate algorithms, the testing and validation instances, the parameter calibration procedure, and the hardware and software used.

### Evolutionary Process

To perform algorithm evolution, we designed and implemented an evolutionary algorithm that operates in a genotype-phenotype mode [28]. As genotype, we use a structure that specifies the participation of each heuristic component and typical instructions, and as phenotype, a tree structure that corresponds to the algorithm to be constructed. The evolution of a population with fixed size is performed using binary tournament selection operators between 2 individuals selected randomly, two-point crossover, and binary mutation [27]. Each new population contains binary strings obtained from the current population. Every time a string is generated, the fitness function evaluates the individual, constructs an instructions tree and validates its performance on a set of test instances. Figure 1 describes the evolutionary algorithm scheme, showing the stages involved in the generation of population  $P(t+1)$  from population  $P(t)$ .

The evolutionary process considers 10 executions of 12 problem groups: DSJ, LEL, GOM, MYC, HOS, KOZ, CAR, LAT-SCH, SGB, REG, MYZ and CUL, available at <http://mat.gsia.cmu.edu/COLOR/instances.html>. Consequently, 120 evolutionary processes are performed with populations of 50 individuals and a stopping criterion of 100 generations. To decrease the computational time used in the implementation, the fitness function is evaluated in parallel, considering 6 processors with shared memory. The evaluations are distributed among the parallel processors from a waiting queue.

### Representing the Genotype and Phenotype

The elementary components of the artificially generated algorithms are identified using an integer number that is transformed into a binary number. Five bits are thus used to represent 32 different components. A binary string indicates the components and the order in which they are selected to construct the corresponding artificial algorithm (phenotype), represented using a preordered binary tree [29]. Figure 2 describes a string with 30 bits and a binary tree with six nodes.

### Data Structure

The data structure from which the artificial algorithms are created stores the graph to be colored. The graph is stored in an adjacent list. Implementation uses the Boost Graph Library [30], which contains functions optimized for recurrent operations on graphs.

### Fitness Function

We define a fitness function containing three terms: the first measures the coloring degree of the graph, the second represents the number of colors used, and the third corresponds to the tree size.

Let  $I = \{1, 2, \dots, n_f\}$  be a set of instances in the VCP, and let us introduce the following definitions:

- $\mathcal{G}_i$ : number of colors used to color graph  $i$ ,
- $h$ : tree depth,
- $n_{c_i}$ : number of vertices with a color assigned to graph  $i$ ,
- $n_{v_i}$ : total number of vertices in graph  $i$ ,
- $\chi_i(G)$ : best known chromatic number for graph  $i$ ,
- $\delta_i$ : number of nodes in algorithm  $i$ .

Let  $\varphi_i$  be the relative error of the number of colored vertices with respect to the number of vertices in problem  $i$  (Eq. 1).

$$\varphi_i = \frac{n_{v_i} - n_{c_i}}{n_{v_i}} \quad \forall i \in I \tag{1}$$

Equation 2 corresponds to the fitness function. The first internal term of the summation represents the average relative error of the number of colors used for all instances, the second weights the average deviation of the best chromatic number known, and the third weights a deviation of the tree size for a height defined by  $h$ . The values of  $f(G)$  are in the  $[0, 1]$  range. The terms are weighted parametrically by values  $a$ ,  $b$  and  $c$ .

$$f(G) = \frac{\sum_{i=1}^{n_f} \left( a \cdot \varphi_i \cdot \lceil \varphi_i \rceil + b \left( \lceil \varphi_i \rceil + (1 - \lceil \varphi_i \rceil) \cdot \frac{\chi_i(G) - \varphi_i}{\chi_i(G)} \right) + c \cdot \left( \frac{\delta_i}{2^{h+1} - 1} \right) \right)}{N_f} \tag{2}$$

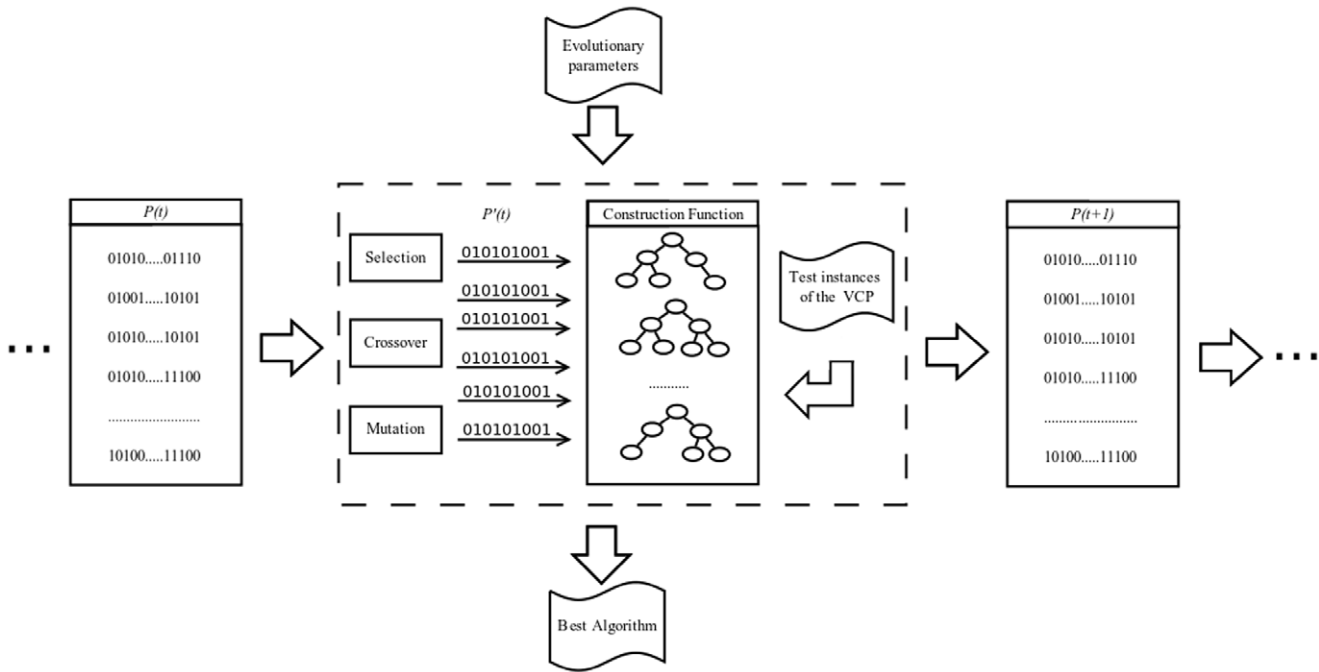

**Figure 1. Evolutionary process.**  
doi:10.1371/journal.pone.0058551.g001

**Function and Terminal Definitions**

As elementary components of the produced algorithms, function and terminal sets are defined. Executing a function requires one or two arguments that can also be functions or terminals, denoted  $function(argument1, argument2)$ . Each graph vertex is numbered, as are the colors available for coloring. The functions are subdivided into coloring and generic functions. The former assign a color to the vertex based on a defined criterion and require a terminal that returns a vertex as an argument, while the latter receive a Boolean value as an argument that corresponds to the evaluation of a subtree.

**Coloring Functions**

- **Greedy (v):** It assigns the least feasible color to vertex  $v$ . When changing the vertex color, the function returns the value true, otherwise it returns false. It is based on the *Iterated Greedy* algorithm [9].

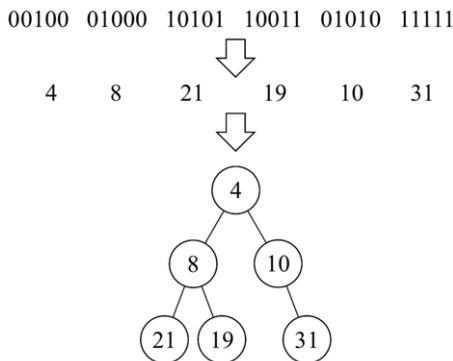

**Figure 2. Decoding a binary string.**  
doi:10.1371/journal.pone.0058551.g002

- **More-frequent-color(v):** It assigns the feasible color with higher frequency in the graph to vertex  $v$ . If this is not possible, it assigns a color to the vertex using *Greedy (v)*. If the function changes the color assigned to the vertex, it returns true; otherwise, it returns false.
- **Less-frequent-color(v):** It assigns a less frequent feasible color in the graph to vertex  $v$ . If this is not possible, it assigns a feasible color that does not generate conflicts using *Greedy (v)*. If the function changes the color assigned to the vertex, it returns true; otherwise, it returns false.
- **Swap-color(v<sub>1</sub>,v<sub>2</sub>):** It exchanges the color of vertex  $v_1$  with that of vertex  $v_2$ . If no conflicts are generated, it returns true; otherwise, it returns false.
- **Greedy-adjacents(v):** It assigns a feasible color to the vertices adjacent to  $v$  using *Greedy(v)* and returns the value true if it assigns at least one color to an adjacent vertex; otherwise, it returns false.
- **Uncoloring(v):** It removes the current color of  $v$ , returning the true value; if  $v$  has no color assigned, it returns false.
- **Uncoloring-adjacents(v):** It removes the color of each vertex adjacent to  $v$  and returns a true value if removing at least one color is feasible; otherwise, it returns false.

**Generic Functions**

A set of generic functions, i.e., those that participate in the algorithms as control structures, is defined; they are denoted using arborescent arguments:  $Equal(P_1,P_2)$ ,  $And(P_1,P_2)$ ,  $Or(P_1,P_2)$ , and  $Not(P_1,P_2)$ . The following two functions are also used:

- **If (P<sub>1</sub>,P<sub>2</sub>):** It executes *subtree P<sub>2</sub>* if *subtree P<sub>1</sub>* has a true value. It returns a true value if executing the second argument is feasible (regardless of its return); otherwise, it returns false.
- **While (P<sub>1</sub>,P<sub>2</sub>):** It performs a cycle on *subtree P<sub>2</sub>* if the condition of *subtree P<sub>1</sub>* remains true. It returns true when it modifies the

graph color; otherwise, it returns false. *Subtree*  $P_1$  corresponds to the condition and *subtree*  $P_2$  to the body. The stop criterion is met when  $P_1$  returns false, or when a number of iterations (10) elapses without any change in the data structure or when it is exceeded a predefined maximum number of iterations equal to number of vertices of the instance. Figure 3a shows a tree with a cycle whose left offspring is the condition and right offspring the body. Fig. 3b shows its equivalent pseudocode.

### Set of Terminals

The terminals are subdivided into vertex identifiers and state indicators. The vertex identifiers aim to identify particular vertices in the graph. If no vertex is found that fulfills the desired characteristic, it returns false. Conversely, the latter return true or false, and they are used as arguments of the condition of generic functions.

### Vertex Searching Terminals

- **First-vertex:** It identifies the lowest numbered vertex, uses the First-Fit [31] vertex selection criterion, and returns false if it does not find a vertex with that characteristic.
- **More-frequent-color-vertex:** It identifies the highest numbered vertex with the most frequently used color in the graph; if it does not exist, it returns false.
- **Less-frequent-color-vertex:** It identifies the lowest numbered colored vertex with a less frequent color; if it does not exist, it returns false.
- **Lowest-numbered-color-vertex:** It identifies the highest numbered vertex with the lowest numbered color; if it does not exist, it returns false.
- **Highest-numbered-color-vertex:** It identifies the highest numbered vertex with the highest numbered color; if it does not exist, it returns false.
- **Minimum-degree-vertex:** It identifies the lowest numbered vertex with the fewest adjacent vertices, based on the Minimum Degree Ordering [32] vertex selection criterion; if the vertex does not exist, it returns false.
- **Largest-degree-vertex:** It identifies the vertex with the most adjacent vertices. If there is more than one vertex that fulfills this characteristic, it returns the lowest numbered vertex that fulfills this condition, based on the Modified Largest Degree Ordering [31] vertex selection criterion; if the vertex does not exist, it returns false.
- **Saturation-degree-vertex:** It identifies the vertex with the most adjacent vertices with different assigned colors, based on the Saturation Degree Ordering vertex selection criterion used

by the *DSATUR* algorithm. If more than one vertex has this characteristic, it returns the lowest numbered vertex; otherwise, it returns false.

- **Incidence-degree-vertex:** It identifies the lowest numbered vertex with the most colored adjacent vertices, based on the Incidence Degree Ordering [31] vertex selection criterion; if it does not find a vertex, it returns false.
- **More-uncolored-adjacents-vertex:** It identifies the lowest numbered vertex with the most uncolored adjacent vertices, according to the vertex selection criterion of the RLF algorithm; if it does not find a vertex, it returns false.

### Boolean Terminals

These are variables that indicate the coloring state of the graph at any construction stage. The first, *Not-increase*, indicates if there is an increase of the number of colors used to color the graph. The other variable, *Exist-uncolored-vertex*, indicates if uncolored vertices remain in the graph.

### Adaptation and Test Cases

The problems used to test and adapt the individuals comprise a problem set from the DIMACS benchmark, which compiles instances considered as a standard set for the VCP [33].

### Parameter Calibration

The evolutionary algorithms' computational performance has a direct relationship with the parameters used in the experimental stage. The parameters involved are the probabilities of crossover and mutation, the number of generations, the chromosome length and the parameters  $a$ ,  $b$  and  $c$  of the fitness function. Based on the studies by Grefenstette [34], the crossover probability is set to 0.9. The mutation probability was fine-tuned with the following values: {0.005, 0.01, 0.02, 0.04, 0.08, 0.10, 0.12, 0.14, 0.16, 0.18, 0.20}, and it delivered a value of 0.16. In preliminary experiments, no improvements are detected after 100 iterations; the detention criterion of the evolutionary algorithm is thus set to 100 generations. In contrast with other problems approaches using evolutionary algorithms, where chromosome length is automatically defined by considering the problem to solve as the basis, e.g., in the travelling salesman problem, which is based on the number of cities [35], for this approach we must determine the chromosome length parameter. A fine-tuning is thus performed using the values {40, 80, 160, 320}, which delivers the value 160. Finally, the weights of the fitness function were adjusted in preliminary tests to give greater importance to the minimization of the error; the values adopted were:  $a = 0.3$ ,  $b = 0.6$  and  $c = 0.1$ .

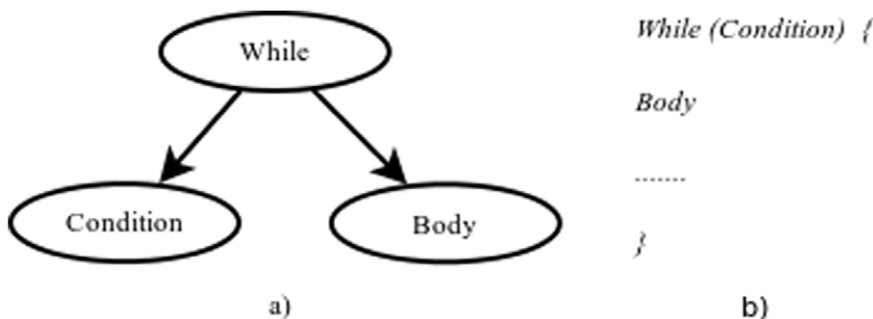

**Figure 3. While cycle and its equivalence in pseudocode.**  
doi:10.1371/journal.pone.0058551.g003

## Hardware Used

A computer cluster was used, containing two machines with *Intel Xeon E5045 2 GHz* processors with 16 GB RAM, and six other machines with *AMD Opteron 2210 1.8 GHz* processors with 2 GB RAM. All used the *GNU/Linux Ubuntu 10.10* distribution.

## Results and Discussion

As the evolutionary process advances, increasingly better individuals are generated until reaching the final stages, where there is a convergence to populations with individuals of diverse quality; most of these populations have a fitness value close to the best value of the population. Figure 4 shows a typical case of the evolutionary process, considering 5,000 individuals that correspond to one of the 10 runs made on a problem group. The ordinate shows the fitness value, and the abscissa indicates the generation number. In this case, the randomly generated population had fitness values approximately between 0.6 and 0.9; in the first generations, there is already a strong decrease in the fitness value of the best individual of each population. Starting in generation 27, the average value and the value of the best individual are close to one another. The best individual obtained in this run was found in generation 42. The curve of the worst individual during the process shows an individual with a fitness value close to 0.9 in many generations, which corresponds to individuals that do not color the graph correctly, according to our fitness definition, and therefore have a positive penalty value. However, their presence is detected with increasingly lower frequencies because the number of individuals that correctly color each graph typically increases, following the trend in Figure 5 for the same run.

The different individuals generated during the evolutionary process can be manually decoded from their tree structure into their corresponding algorithms, described in pseudocode. The computational experiment was carried out using  $h=9$  in Eq. 2, thus ensuring that we obtain individuals with a legible and

decodable structure in their algorithms. Algorithm 1 presents an illustrative case, which is obtained from the individual shown in Figure 6; its nodes correspond to the defined functions and terminals, and the arcs of each function or terminal define how the procedure works. According to the defined functions and terminals, Algorithm 1 is a constructive and greedy algorithm because it gradually colors the graph every time it applies a color and tries to not increase the number of colors. In its main stage, the algorithm selects a vertex using a criterion similar to the DSATUR algorithm to color it with the most frequent color. It performs this task within a *while* cycle (instructions 3 to 5), and refines the solution found (instructions 6 to 10), either by coloring the remaining vertices or exchanging already assigned colors.

Algorithm 1: Pseudocode of A3

**Input:** Graph

**Output:** ColoredGraph

01: More-frequent-color (More-uncolored-adjacents-vertex)

02: **while** More-frequent-color (First-vertex) **do**

03:     **while** Lowest-numbered-color-vertex **do**

04:         More-frequent-color (Saturation-degree-vertex)

05:     **end while**

06:     Less-frequent-color (Saturation-degree-vertex)

07:     Greedy-adjacents (Incidence-degree-vertex)

08:     Swap-color (Largest-degree-vertex, More-uncolored-adjacents-vertex)

09:     **If** More-frequent-color-vertex **then**

10:         Greedy-adjacents (Incidence-degree-vertex)

11:     **end if**

12: **end while**

13: **return** Graph Colored

The size of the individuals measured using tree height tends to stabilize at a value close to the height parameterized at the beginning of the evolutionary process. The initial randomly generated population determines a disperse range of possible heights for the individuals, and this range tends to decrease

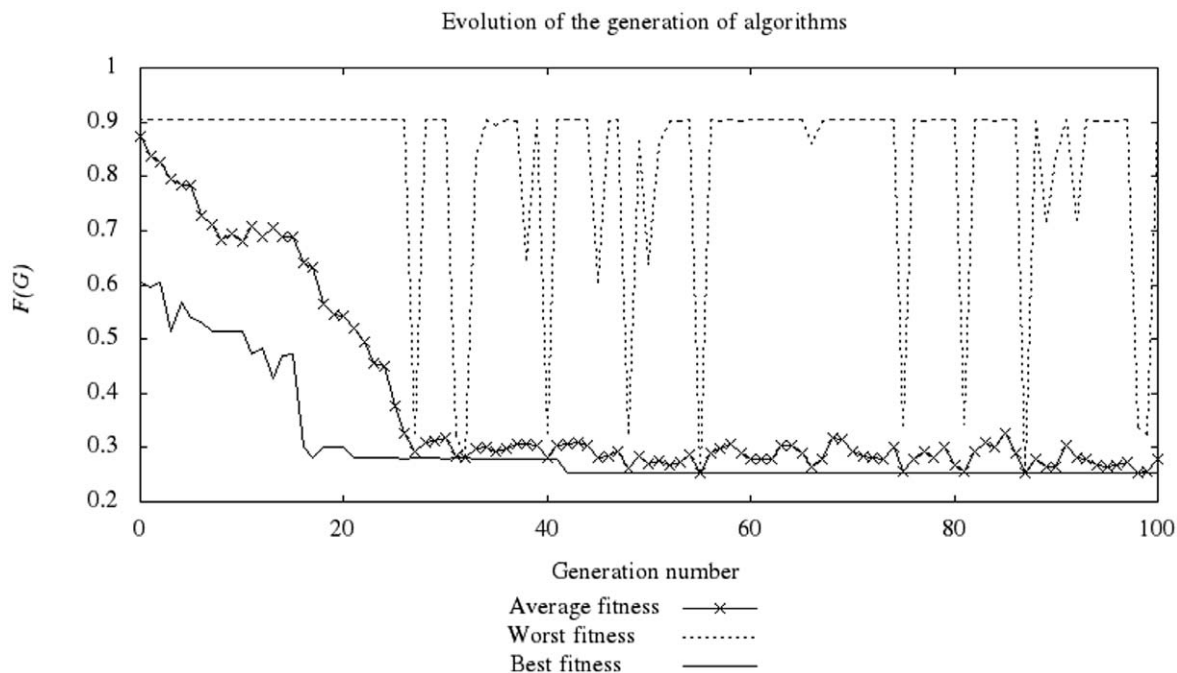

**Figure 4. Evolving VCP algorithms.**

doi:10.1371/journal.pone.0058551.g004

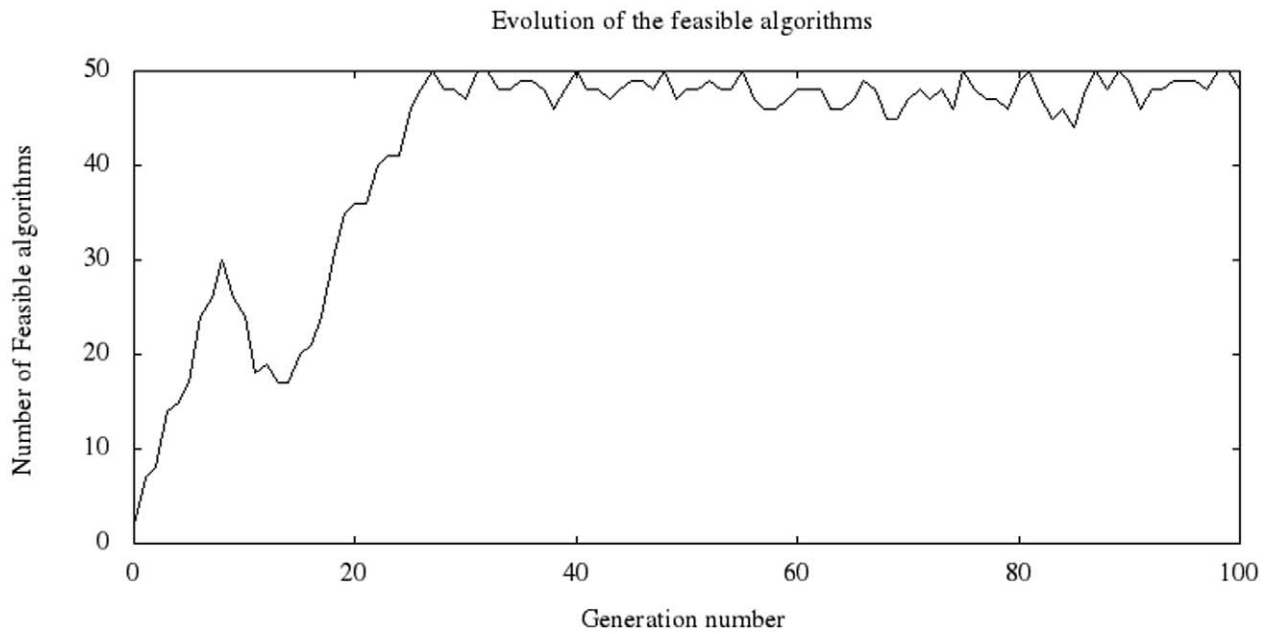

**Figure 5. Evolution of feasible algorithms.**  
doi:10.1371/journal.pone.0058551.g005

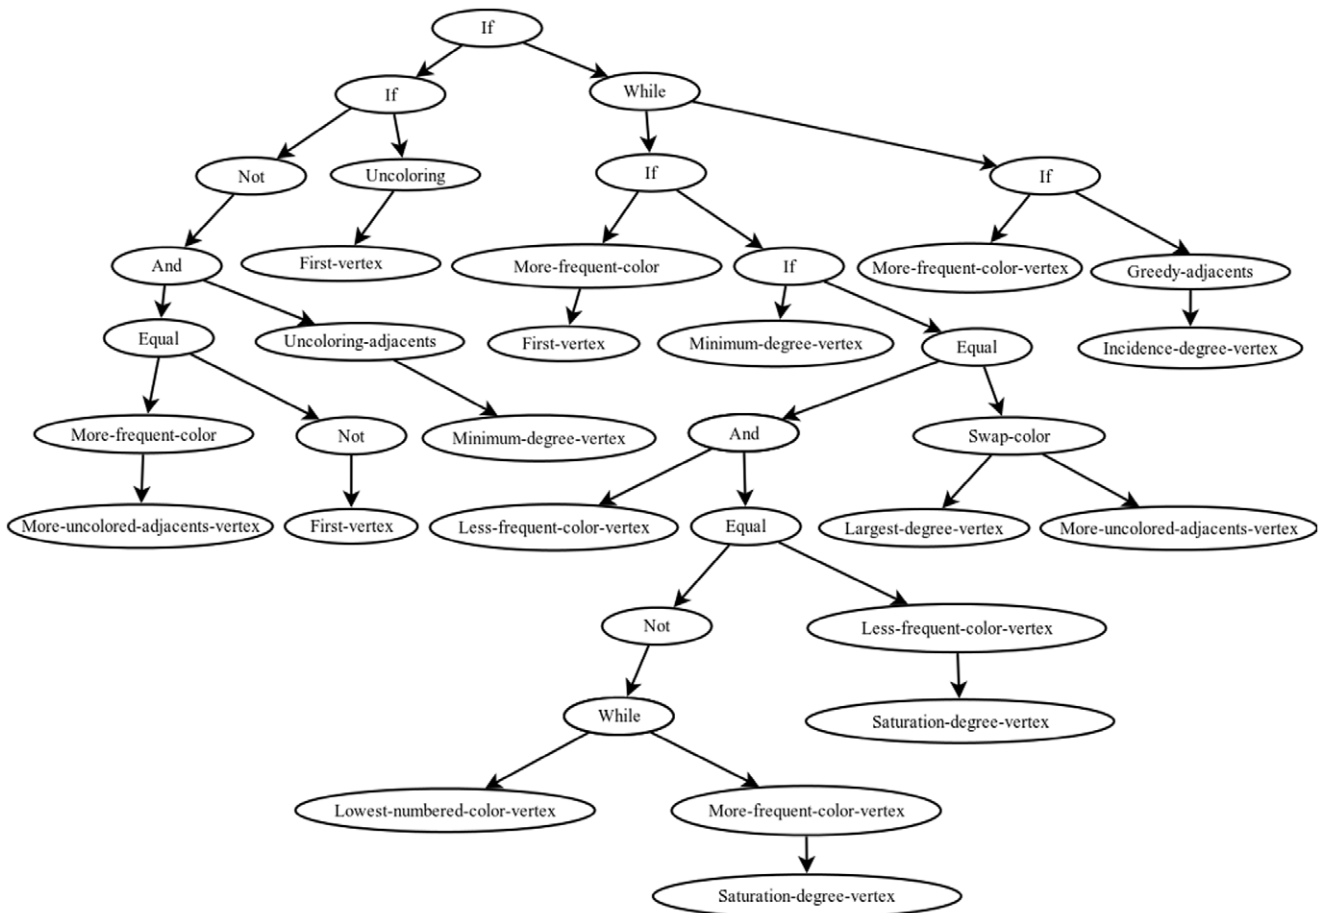

**Figure 6. Representation tree of algorithm A3.**  
doi:10.1371/journal.pone.0058551.g006

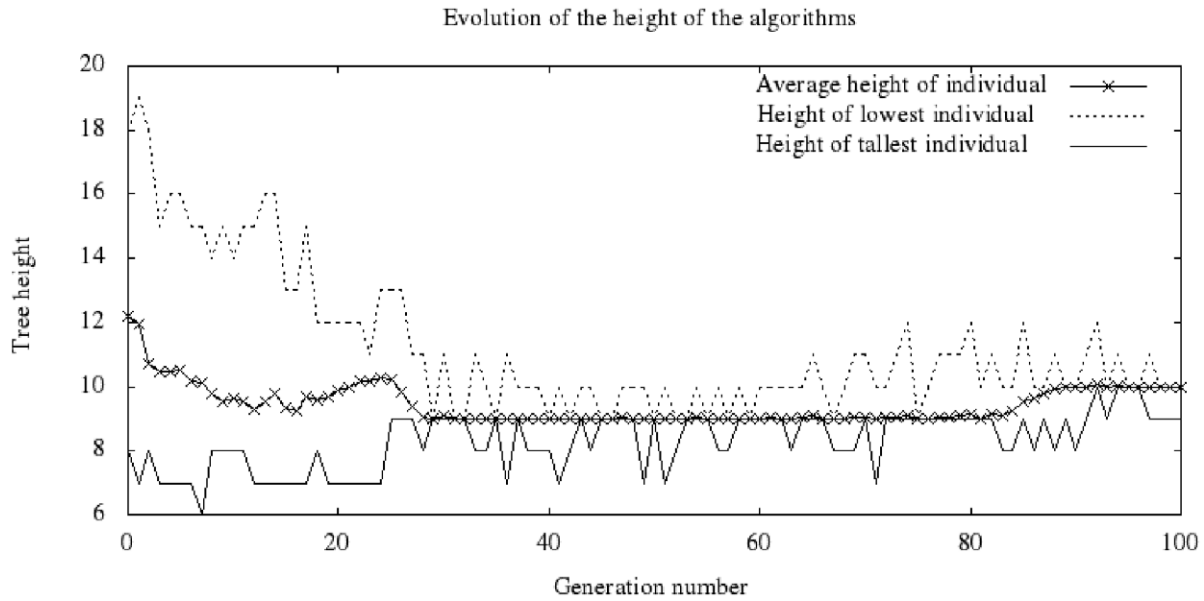

**Figure 7. Evolution of the tree height.**  
doi:10.1371/journal.pone.0058551.g007

gradually as the evolutionary process occurs. Figure 7 illustrates a typical case, which corresponds to the same run presented in Figures 4 and 5. The figure shows the maximum, minimum and average height values in each population. Some stability can be identified in the individuals produced, with a value of 9, during 50 consecutive generations. This behavior is essentially due to the penalty considered in the fitness function.

The various algorithms demonstrate the presence of common structures with characteristics similar to the existing heuristics for the VCP. Figure 8 shows two such structures. The first one (8a) corresponds to a greedy coloring of a vertex selected using the criterion of neighboring vertices with different colors, which is similar to the *DSATUR* heuristic algorithm; the second (8b) corresponds to a greedy coloring of the vertex with the highest degree, as in the Largest First algorithm [31].

The algorithms obtained through the evolutionary process are numerically competitive with elementary heuristics that solve the VCP. The generated algorithms find optimum solutions for some problems, as do existing heuristics. Table 1 presents the numerical results of three algorithms: the first produced with the DSJ instances, and the second and third with LEI. They are tested using 29 problems from the *DIMACS* benchmark. The first six columns correspond to the problem name, number of vertices, number of edges, density, optimum chromatic number, and best known chromatic number. The following four columns correspond to results obtained from heuristics presented in the literature: *Greedy Sequential*, *Largest First*, *Smallest First*, and *DSATUR*, which we consider as the conceptual bases for constructing our functions and terminals. The last six columns correspond to the chromatic number and computational time of our three

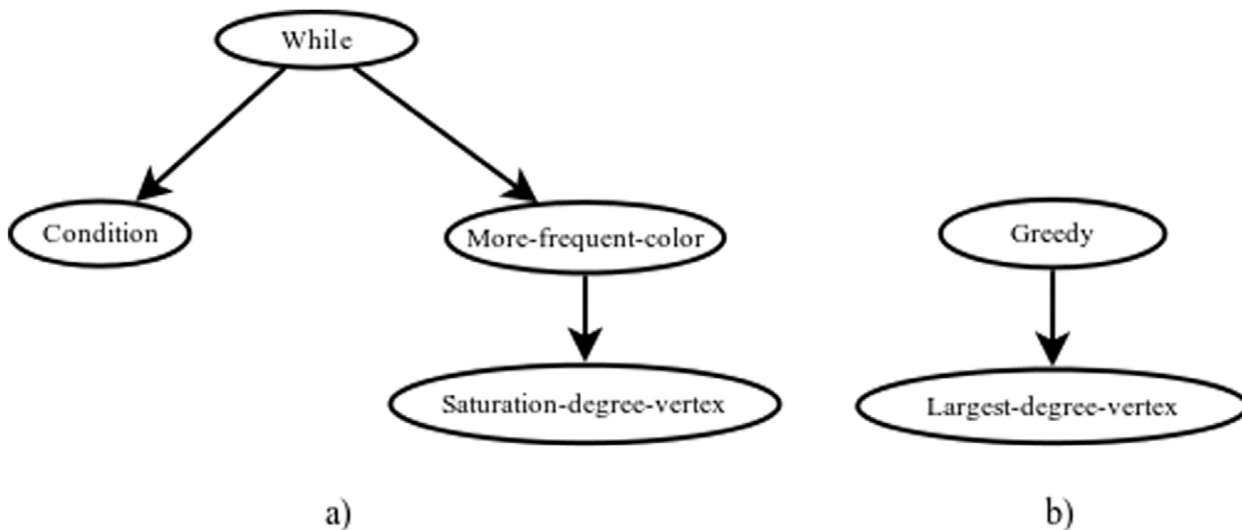

**Figure 8. Repetitive constructions observed in the obtained individuals.**  
doi:10.1371/journal.pone.0058551.g008

**Table 1.** Numerical results.

| Instance   | n    | m      | d(G)  | $\chi(G)$ | Best( $\chi$ ) | Greedy Sequential | Largest First | Smallest First | DSATUR | A1     |          | A2     |          | A3     |          | Best $\rho$ |
|------------|------|--------|-------|-----------|----------------|-------------------|---------------|----------------|--------|--------|----------|--------|----------|--------|----------|-------------|
|            |      |        |       |           |                |                   |               |                |        | $\rho$ | Time (s) | $\rho$ | Time (s) | $\rho$ | Time (s) |             |
| DSJC125.1  | 125  | 736    | 0.095 | 7         | 5              | 8                 | 8             | 8              | 6      | 6      | 0.016    | 6      | 0.020    | 7      | 0.012    | 6           |
| DSJC125.5  | 125  | 3891   | 0.502 | 7         | 17             | 26                | 24            | 29             | 22     | 22     | 0.073    | 22     | 2.890    | 23     | 2.921    | 22          |
| DSJC125.9  | 125  | 6961   | 0.898 | 7         | 44             | 56                | 56            | 59             | 51     | 52     | 0.161    | 52     | 10.315   | 52     | 10.696   | 52          |
| DSJRS00.1  | 500  | 3555   | 0.028 | 12        | 12             | 15                | 15            | 16             | 13     | 13     | 0.142    | 13     | 0.205    | 12     | 0.099    | 12          |
| DSJRS00.1c | 500  | 121275 | 0.972 | 7         | 85             | 109               | 107           | 121            | 90     | 93     | 12.613   | 93     | 30.524   | 93     | 18.536   | 93          |
| DSJRS00.5  | 500  | 58862  | 0.472 | 122       | 122            | 143               | 143           | 159            | 130    | 127    | 4.219    | 127    | 41.784   | 126    | 26.962   | 126         |
| r125.1c    | 125  | 7501   | 0.968 | 46        | 46             | 51                | 50            | 51             | 46     | 46     | 0.241    | 46     | 11.497   | 46     | 10.735   | 46          |
| r125.5     | 125  | 3838   | 0.495 | 36        | 36             | 44                | 44            | 47             | 38     | 39     | 0.091    | 39     | 9.305    | 39     | 11.222   | 39          |
| r250.1     | 250  | 867    | 0.028 | 8         | 8              | 9                 | 9             | 11             | 8      | 8      | 0.054    | 8      | 0.043    | 8      | 0.017    | 8           |
| r250.1c    | 250  | 30227  | 0.971 | 64        | 64             | 76                | 77            | 78             | 65     | 67     | 1.827    | 67     | 14.843   | 67     | 20.321   | 67          |
| r250.5     | 250  | 14849  | 0.477 | 65        | 65             | 79                | 79            | 84             | 68     | 69     | 0.580    | 69     | 14.803   | 67     | 10.519   | 67          |
| r1000.1    | 1000 | 14378  | 0.029 | 20        | 20             | 26                | 26            | 28             | 20     | 20     | 1.339    | 20     | 2.985    | 20     | 1.620    | 20          |
| r1000.5    | 1000 | 238267 | 0.477 | 234       | 234            | 275               | 276           | 317            | 250    | 243    | 36.791   | 245    | 51.879   | 252    | 34.181   | 243         |
| le450_15a  | 450  | 8168   | 0.081 | 15        | 15             | 22                | 21            | 27             | 17     | 17     | 0.449    | 17     | 0.746    | 16     | 0.603    | 16          |
| le450_15b  | 450  | 8169   | 0.081 | 15        | 15             | 22                | 22            | 27             | 16     | 17     | 0.452    | 16     | 0.734    | 17     | 0.573    | 16          |
| le450_15c  | 450  | 16680  | 0.165 | 15        | 15             | 30                | 31            | 40             | 23     | 24     | 1.238    | 24     | 5.067    | 24     | 5.207    | 24          |
| le450_15d  | 450  | 16750  | 0.166 | 15        | 15             | 31                | 30            | 37             | 24     | 24     | 1.241    | 24     | 5.135    | 25     | 5.594    | 24          |
| le450_25a  | 450  | 8260   | 0.082 | 25        | 25             | 28                | 28            | 31             | 25     | 25     | 0.409    | 25     | 1.109    | 25     | 1.009    | 25          |
| le450_25b  | 450  | 8263   | 0.082 | 25        | 25             | 27                | 27            | 34             | 25     | 25     | 0.391    | 25     | 0.971    | 25     | 0.889    | 25          |
| le450_25c  | 450  | 17343  | 0.172 | 25        | 25             | 37                | 36            | 45             | 29     | 29     | 1.178    | 29     | 11.148   | 30     | 10.786   | 29          |
| le450_25d  | 450  | 17425  | 0.172 | 25        | 25             | 35                | 35            | 43             | 28     | 29     | 1.205    | 29     | 11.181   | 28     | 10.663   | 28          |
| le450_5a   | 450  | 5714   | 0.057 | 5         | 5              | 14                | 14            | 16             | 10     | 9      | 0.371    | 10     | 0.425    | 10     | 0.291    | 9           |
| le450_5b   | 450  | 5734   | 0.057 | 5         | 5              | 13                | 13            | 18             | 9      | 10     | 0.363    | 10     | 0.428    | 10     | 0.281    | 10          |
| le450_5c   | 450  | 9803   | 0.097 | 5         | 5              | 17                | 15            | 22             | 10     | 7      | 0.655    | 8      | 0.825    | 10     | 0.741    | 7           |
| le450_5d   | 450  | 9757   | 0.097 | 5         | 5              | 18                | 17            | 24             | 12     | 7      | 0.654    | 7      | 0.823    | 6      | 0.827    | 6           |
| anna       | 138  | 493    | 0.052 | 11        | 11             | 12                | 12            | 13             | 11     | 11     | 0.011    | 11     | 0.018    | 11     | 0.013    | 11          |
| david      | 87   | 406    | 0.109 | 11        | 11             | 12                | 12            | 12             | 11     | 11     | 0.006    | 11     | 0.011    | 11     | 0.007    | 11          |

doi:10.1371/journal.pone.0058551.t001



algorithms, which we call A1, A2 and A3. The symbol “?” indicates that  $\chi(G)$  is unknown for the corresponding instance, and bold characters are used when the best known chromatic number was obtained.

Of the 5,000 total algorithms revised in each evolution, an average of 83.47%, completely color the 12 evolution groups, i.e., approximately 500,810 algorithms feasible in the 120 executions are generated. The average computational time required to evolve the three algorithms from the 12 groups of instances used, considering the 10 executions for each group, is 43.85 hours for each algorithm. Two of the automatically generated algorithms obtain the optimum solution in 24.14% of the test problems, while the third one obtains 27.59% of the optimum solutions. Compared to the selected heuristics, the three algorithms present the same computational performance level, with 29.97% average relative error, while the other four heuristics present 59.73% considering the 29 testing instances. Algorithm A1 obtains 27.56% average relative error, while the DSATUR heuristic obtains 34.30%. For computational time, algorithms A1, A2 and A3 solve the 29 instances in an average of 5.54 seconds. We avoid a computational time comparison between the generated algorithms and the existing heuristics since both are in different languages (interpreted and compiled, respectively).

## References

- Matula DM, Marble G, Isaacson JD (1972) Graph coloring algorithms. In: Read RC, editor. *Graph theory and Computing*. (pp 109–122). New York: Academic Press.
- Garey M, Johnson D (1979) *Computers and Intractability: A Guide to the theory of NP-completeness*. New York: W. H. Freeman & Co.
- Malaguti E, Toth P (2010) A survey on vertex coloring problems. *International Transactions on Operational Research* 17: 1–34.
- Méndez-Díaz I, Zabala P (2006) A branch-and-cut algorithm for graph coloring. *Discrete Applied Mathematics* 154: 826–847.
- Méndez-Díaz I, Zabala P (2008) A cutting plane algorithm for graph coloring. *Discrete Applied Mathematics* 156: 159–179.
- Malaguti E, Monaci M, Toth P (2011) An exact approach for the Vertex Coloring Problem. *Discrete Optimization* 8: 174–190.
- Brélez D (1979) New methods to color the vertices of a graph. *Communications of the ACM* 22: 251–256.
- Leighton FT (1979) A graph coloring algorithm for large scheduling problems. *Journal of Research of the National Bureau of Standards* 84: 489–503.
- Culberson JC, Luo F (1996) Exploring the k-colorable landscape with iterated greedy. In: Johnson DS, Trick MA, editors. *Cliques, Coloring and Satisfiability*. DIMACS Series in Discrete Mathematics and Theoretical Computer Science. (Vol 26, 245–284). Providence: American Mathematical Society.
- Malaguti E, Monaci M, Toth P (2008) A metaheuristic approach for the vertex coloring problem. *INFORMS Journal on Computing* 20: 302–316.
- Titiloye O, Crispin A (2011) Graph coloring with a distributed hybrid quantum annealing algorithm. In: O’Shea J, Nguyen NT, Crockett K, Howlett RJ, Jain LC, editors. *Agent and multi-agent systems: technologies and applications*. (Vol 6682, 553–562) Berlin, Heidelberg: Springer Berlin Heidelberg.
- Titiloye O, Crispin A (2011) Quantum annealing of the graph coloring problem. *Discrete Optimization* 8: 376–384.
- Hertz A, Werra D (1987) Using tabu search techniques for graph coloring. *Computing* 39: 345–351.
- Porumbel DC, Hao JK, Kuntz P (2010) An evolutionary approach with diversity guarantee and well-informed grouping recombination for graph coloring. *Computers & Operations Research* 37: 1822–1832.
- Minton S (1993) An analytic learning system for specializing heuristics. *Proceedings of the 13th International Joint Conference on Artificial Intelligence - Volume 2*. IJCAI’93. San Francisco: Morgan Kaufmann Publishers Inc. 922–928.
- Epstein SL, Freuder EC, Wallace R, Morozov A, Samuels B (2006) The Adaptive Constraint Engine. In: Hentenryck PV, editor. *Principles and Practice of Constraint Programming - CP 2002*. Lecture Notes in Computer Science. Heidelberg: Springer Berlin, 525–540.
- Nareyek A (2004) Choosing search heuristics by non-stationary reinforcement learning. In: Resende MGC, de Sousa JP, Viana A, editors. *Metaheuristics*. Norwell: Kluwer Academic Publishers, 523–544.
- Bain S, Thornton J, Sattar A (2005) Evolving variable-ordering heuristics for constrained optimisation. In: Beek P van, editor. *Principles and Practice of*

## Conclusions

This paper presents the results of three new algorithms to solve the VCP. The algorithms were produced using an evolutionary computation procedure designed and implemented for that purpose that combines components of the elementary heuristics and control structures. To evolve the algorithms, 12 groups of instances selected from the DIMACS benchmark were used, and a set of 29 instances was considered to test them.

The algorithms evolved from an initial population and improved gradually as the evolutionary process occurred. The algorithm sizes stabilized at a value near the size originally given as a reference. The new algorithms are competitive in the quality of the obtained solutions to the previously existing heuristics for solving the problem; the average relative error for the testing problems is lower than the average error of the heuristics considered in the research. The new algorithms are characterized by the presence of structures similar to those in the existing heuristics for the problem.

## Author Contributions

Conceived and designed the experiments: CCB GG VP. Performed the experiments: CCB GG VP. Analyzed the data: CCB GG VP. Contributed reagents/materials/analysis tools: CCB GG VP. Wrote the paper: CCB GG VP.

- Constraint Programming - CP 2005. Lecture Notes in Computer Science. Heidelberg: Springer Berlin, 732–736.
- Koza JR (1992) *Genetic programming: on the programming of computers by means of natural selection*. Cambridge: MIT Press.
- Koza JR, Keane MA, Streeter MJ, Mydlowec W, Yu J, Lanza G (2003) *Genetic Programming IV: Routine Human-Competitive Machine Intelligence*. Norwell: Kluwer Academic Publishers.
- Fukunaga A (2002) Automated discovery of composite SAT variable-selection heuristics. Eighteenth National Conference on Artificial Intelligence. Menlo Park: American Association for Artificial Intelligence. 641–648.
- Fukunaga A (2008) Automated discovery of local search heuristics for satisfiability testing. *Evolutionary Computation* 16: 31–61.
- Burke EK, Hyde MR, Kendall G, Ochoa G, Özcan E, et al. (2010) A classification of hyper-heuristic approaches. In: Gendreau M, Potvin J-Y, editors. *Handbook of Metaheuristics*. Springer US, Vol. 146. 1–21.
- Burke EK, McCollum B, Meisels A, Petrovic S, Qu R (2007) A graph-based hyper-heuristic for educational timetabling problems. *European Journal of Operational Research*. 176: 177–192.
- Burke EK, Hyde M, Kendall G, Woodward J (2010) A genetic programming hyper-heuristic approach for evolving 2-d strip packing heuristics. *IEEE Transactions on Evolutionary Computation*, 14: 942–958.
- Poli R, Langdon W, McPhee N (2008) *A Field Guide to Genetic Programming*. Published via <http://lulu.com> and freely available at <http://www.gp-field-guide.org.uk>.
- Affenzeller M, Winkler S, Wagner S, Beham A (2009) *Genetic algorithms and genetic programming: modern concepts and practical applications*. 1st ed. Boca Raton: Chapman and Hall/CRC.
- Falkenauer E (1998) *Genetic algorithms and grouping problems*. New York: John Wiley & Sons, Inc.
- Aho AV, Hopcroft JE, Ullman J (1983) *Data structures and algorithms*. 1st ed. Boston: Addison-Wesley Longman Publishing Co., Inc.
- Siek J, Lee LQ, Lumsdaine A (2001) *The boost graph library: user guide and reference manual*. Boston: Addison-Wesley Longman Publishing Co., Inc.
- Al-Omari H, Sabri KE (2006) New graph coloring algorithms. *Journal of Mathematics and Statistics* 2: 739–741.
- George A, Liu JWH (1989) The evolution of the minimum degree ordering algorithm. *SIAM Review* 31: 1–19.
- Johnson DS, Trick MA (1996) Introduction to the second DIMACS challenge: Cliques, coloring, and satisfiability. In: Johnson DS, Trick MA, editors. *Cliques, coloring, and satisfiability*. DIMACS Series in Discrete Mathematics and Theoretical Computer Science. (Vol 26, 1–7). Providence: American Mathematical Society.
- Grefenstette JJ (1986) Optimization of control parameters for genetic algorithms. *IEEE Transactions on Systems, Man and Cybernetics* 16: 122–128.
- Rothlauf F (2006) Representations for genetic and evolutionary algorithms. 2nd ed. Secaucus: Springer-Verlag New York, Inc.
